# Supplementary material for: Post-transplant cyclophosphamide versus anti-thymocyte globulin after reduced intensity peripheral blood allogeneic cell transplantation in recipients of matched sibling or 10/10 HLA matched unrelated donors: final analysis of a randomized, open-label, multicenter, phase 2 trial
Source: PubMed Central journal article supplement (PMC10876658; doi:10.1038/s41408-024-00990-3), 2024-02-19
Supplement: 41408_2024_990_MOESM2_ESM.pdf [file 41408_2024_990_MOESM2_ESM.pdf]

**Table S1. Outcomes of the 8 patients who dropped out in the ATG arm**

| n° | Reason for drop out                                | allo-HCT | Date of allo-HCT                             | GVHD              | Relapse                          | Last status (time from randomization) | Cause of death      |
|----|----------------------------------------------------|----------|----------------------------------------------|-------------------|----------------------------------|---------------------------------------|---------------------|
| 1  | relapse 19 days after randomization                | No       |                                              |                   | Yes (day 19 post randomization)  | death day 91                          | relapse/progression |
| 2  | Donor not available => haploidentical donor chosen | Yes      | 09/29/2017                                   |                   | No                               | alive day 1573                        |                     |
| 3  | relapse 1 day after randomization                  | No       |                                              |                   | Yes (day 1 post randomization)   | death day 63                          | relapse/progression |
| 4  | molecular relapse day 15 before allo-HCT           | Yes      | 03/07/2018 (sequential conditioning regimen) | GVH skin grade II | Yes (day 991 post randomization) | death day 1013                        | relapse/progression |
| 5  | molecular relapse before allo-HCT                  | Yes      | 10/25/2017 (sequential conditioning regimen) |                   | Yes (day 83 post randomization)  | death day 226                         | relapse/progression |
| 6  | relapse 13 days after randomization                | No       |                                              |                   | Yes (day 13 after randomization) | death day 421                         | relapse/progression |
| 7  | donor has EBV replication                          | Yes      | 01/29/2019                                   | GVHD skin & gut   | No                               | death day 867                         | infection (Covid)   |
| 8  | relapse 1 day after randomization                  | Yes      | 08/01/2017 (sequential conditioning regimen) | No                | Yes (day 64 after randomization) | death day 73                          | relapse/progression |

**Table S2: Acute GVHD, extent of organ involvement**

|                                                                                                                      | Stage | PTCy, n (%) | ATG, n (%) | p value |
|----------------------------------------------------------------------------------------------------------------------|-------|-------------|------------|---------|
| Skin                                                                                                                 | 0     | 19 (43.2%)  | 22 (59.5%) | 0.43    |
|                                                                                                                      | 1     | 10 (22.7%)  | 5 (13.5%)  |         |
|                                                                                                                      | 2     | 11 (25.0%)  | 6 (16.2%)  |         |
|                                                                                                                      | 3     | 4 (9.10%)   | 4 (10.8%)  |         |
| Liver                                                                                                                | 0     | 40 (90.9%)  | 34 (91.9%) | 0.69    |
|                                                                                                                      | 1     | 2 (4.5%)    | 1 (2.7%)   |         |
|                                                                                                                      | 2     | 1 (2.3%)    | 1 (2.7%)   |         |
|                                                                                                                      | 3     | 1 (2.3%)    | 0 (0%)     |         |
|                                                                                                                      | 4     | 0 (0%)      | 1 (2.7%)   |         |
| Gut                                                                                                                  | 0     | 36 (81.8%)  | 32 (86.5%) | 0.45    |
|                                                                                                                      | 1     | 3 (6.8%)    | 3 (8.1%)   |         |
|                                                                                                                      | 2     | 2 (4.5%)    | 0 (0%)     |         |
|                                                                                                                      | 3     | 3 (6.8%)    | 1 (2.7%)   |         |
|                                                                                                                      | 4     | 0 (0%)      | 1 (2.7%)   |         |
| abbreviations: GVHD: graft-versus-host disease, PTCy: post-transplant cyclophosphamide, ATG: anti-thymocyte globulin |       |             |            |         |

**Table S3. Cause of death**

| Cause of death                            | N  |
|-------------------------------------------|----|
| Relapse                                   | 16 |
| GVHD                                      | 3  |
| Infection                                 | 6  |
| Hemorrhage                                | 2  |
| VOD/SOS                                   | 1  |
| Other (1 mesenteric ischemia, 1 melanoma) | 2  |
| Total                                     | 30 |
| Missing                                   | 1  |

Abbreviations: GVHD: graft-versus-host disease, VOD/SOS: Hepatic veno-occlusive disease/sinusoidal obstruction syndrome
